# Supplementary material
Source: PubMed Central journal article supplement (PMC2430997)
Supplement: jbc_M800544200_1.pdf [file jbc_M800544200_1.pdf]

**SUPPLEMENTAL DATA**

**Table 1.** Oligonucleotide and Primer Sequences (all 5' to 3')

|                                                             |                                                                     |
|-------------------------------------------------------------|---------------------------------------------------------------------|
| <i>attR_for</i>                                             | CTTGCGCTAATGCTCTGTAC                                                |
| <i>attR_rev</i>                                             | ACCTTCCCGTTTCGCTCAAG                                                |
| <i>attL_for</i>                                             | GAAAAATGAATCCGTTGAAG                                                |
| <i>attL_rev</i>                                             | GTGATGACAGAGGCAGGGAG                                                |
| HJ_R_primer                                                 | AGAATTCCAACCTAGTA                                                   |
| P'1_TS                                                      | GCATTTGTTGCAACGAACAGGTCACTATCAGGG                                   |
| P'1Bio_TS                                                   | GCATTTGTTGCAACGAACAGG[Bio-dT]CACTATCAGGG                            |
| P'1_BS                                                      | CCCTGATAGTGACCTGTTCTGTTGCAACAAATGC                                  |
| P'123_TS (50mer)                                            | CGAACAGGTCACTATCAGTCAAAAATAAAAATCATTATTTGATTACCATCAA                |
| P'12[Bio3]_TS (50mer)                                       | CGAACAGGTCACTATCAGTCAAAAATAAAA[Bio_dT]CATTATTTGATTACCATCAA          |
| P'123_BS (50mer)                                            | TTGATGGTAATCAAATAATGATTTTATTTTGACTGATAGTGACCTGTTTCG                 |
| P'12[Bio3]_BS (50mer)                                       | TTGATGGTAATCAAATAA[Bio_dT]GATTTTATTTTGACTGATAGTGACCTGTTTCG          |
| PR45 (WT <i>attR</i> forward)                               | GCTCTGTTACAGGTCACTAATACCATCTAAGTAGTTGATTCATAG                       |
| P2_Bio ( <i>attR</i> )                                      | GCTCTGTTACAGGTCACTAATACCATCTAAGTAGTTGATTCATAG[Bio_dT]GACTGCATATGTTG |
| NC(-117Bio) ( <i>attR</i> )                                 | GCTCTGTTACAGGTCACTAATACCATCTAAGTAGT[Bio_dT]GATTCATAGTGACTGC         |
| PR45_mut (mutated <i>attR</i> for -112 and -122 insertions) | GCTCTGTTACAGGTCACTAATACCATCTAATTAGTTGATTATAG                        |
| NC(-112Bio) ( <i>attR</i> )                                 | GCTCTGTTACAGGTCACTAATACCATCTAATTAGTTGATT[Bio_dT]ATAG                |
| NC(-122Bio) ( <i>attR</i> )                                 | GCTCTGTTACAGGTCACTAATACCATCTAA[Bio_dT]TAGTTGATTATAG                 |
| PBSPM1 (reverse <i>attR</i> primer)                         | GATGGTCGTCATCTACCTGCTGGACAGCATGG                                    |
| WT_attL (reverse <i>attL</i> primer)                        | GAAATCAAATAATGATTTTATTTTGACTGATAGTGACCTGTTCTGTTGC                   |
| P'1Bio ( <i>attL</i> )                                      | GAAATCAAATAATGATTTTATTTTGACTGATAG[Bio_dT]GACCTGTTCTGTTGC            |
| P'2Bio ( <i>attL</i> )                                      | GAAATCAAATAATGATTTTATTT[Bio_dT]GACTGATAGTGACCTGTTCTGTTGC            |
| P'3Bio ( <i>attL</i> )                                      | GAAATCAAATAA[Bio_dT]GATTTTATTTTGACTGATAGTGACCTGTTCTGTTGC            |
| apaLI ( <i>attL</i> forward primer)                         | GCAGATTGTAAGTGTGACAGGTCAC                                           |
| H= (mutated H1 site, <i>attR</i> )                          | TACAGGTCACTAATACCATCTAACCAAGCCATGCATAGTGACTGC                       |
| NC resect ( <i>attR</i> )                                   | CATAGTACTGATGTTGTTTACAG                                             |
| P'3 resect ( <i>attL</i> )                                  | GCGTATTTTGACTGATAGTGACC                                             |
| XbaP (wt attP forward primer) ( <i>attP</i> )               | GACAAAAATCACCTTGCTCTAGAGCTTTGTTACAGGTCACTAATACC                     |
| XbaP(-149Bio) ( <i>attP</i> )                               | GACAAAAATCACCTTGCTCTAGAGCT[Bio_dT]TGTTACAGGTCACTAATACC              |
| Xba(P1Bio) ( <i>attP</i> )                                  | GACAAAAATCACCTTGCTCTAGAGCTTTGTTACAGG[Bio_dT]CACTAATACC              |
| XbaP2 (mutated attP for -154 and -144 mut.)                 | GCGCAAGAAGTCTAGAATCACCTTGCGCTATTGCTTTGTTTCAGGTCACTAAT               |
| Xba(-154Bio) ( <i>attP</i> )                                | GCGCAAGAAGTCTAGAATCACCTTGCGCTA[Bio_dT]TGCTTTGTTTCAGGTCACTAAT        |
| Xba(-144Bio) ( <i>attP</i> )                                | GCGCAAGAAGTCTAGAATCACCTTGCGCTATTGCTTTGTT[Bio_dT]CAGGTCACTAAT        |
| Xba_rev ( <i>attP</i> reverse primer)                       | GTCATCAAACCTGTCGCACCTAGAGAAGCACAAG                                  |
| BstP (wt attP forward primer)                               | GCTTATCAATTTGTTTCGAACGAACAGGTCACTATCAGTC                            |
| BstP(P'1Bio)                                                | GCTTATCAATTTGTTTCGAACGAACAGG[Bio_dT]CACTATCAGTC                     |
| BstP(P'2Bio)                                                | GCTTATCAATTTGTTTCGAACGAACAGGTCACTATCAG[Bio_dT]CAAAAATAAAATC         |
| BstP(P'3Bio)                                                | GCTTATCAATTTGTTTCGAACGAACAGGTCACTATCAGTCAAAAATAAAA[Bio_dT]CATT      |
| BstPrev1 ( <i>attP</i> rev primer)                          | GACTGATAGTGACCTGTTTCGAACAAATG                                       |
| BstPrev2 ( <i>attP</i> rev primer)                          | GACCTGTTCTGTTTCGAACAAATGATAAGCAATGCTTTTTTAG                         |
| P'123_TS (40mer)                                            | GAACAGGTCACTATCAGTCAAAAATAAAAATCATTATTTGAT                          |
| P'123_BS (40mer)                                            | ATCAAATAATGATTTTATTTTGACTGATAGTGACCTGTTTC                           |
| P'12[Bio3]_TS (40mer)                                       | GAACAGGTCACTATCAGTCAAAAATAAAA[Bio_dT]CATTATTTGAT                    |
| P'12[Bio3]_BS (40mer)                                       | ATCAAATAA[Bio_dT]GATTTTATTTTGACTGATAGTGACCTGTTTC                    |
| P'12_TS (40mer)                                             | GAACAGGTCACTATCAGTCAAAAATTTGATTTTCATACCATA                          |
| P'12_BS (40mer)                                             | TATGGTATGAAATCAAATTTTGACTGATAGTGACCTGTTTC                           |
| CM7COB' (HJ)                                                | GATCGAGTGTATTGCGACTTTTTTATACTAACTTGAGCGG                            |
| CM7BOC' (HJ)                                                | GAACCTGCTTATTATACAAAAGTTGGATCACAATGAA                               |
| CM7C'OC (HJ)                                                | TTCATTGTGATCCAACCTTTGTATAAAAAAGCTGCAATACACTCGATC                    |
| CM7BOB' (HJ)_                                               | CCGCTCAAGTTAGTATAAATAAGCAGAGTTC                                     |
| CM7BOB'_Fluor (HJ)                                          | CCGCTCAAGTTAGTATAAATAAGCAGAG[Bio-FL]TTC                             |
